# Supplementary material for: An Integrated Analysis of miRNA and mRNA Expressions in Non-Small Cell Lung Cancers
Source: PLoS One. 2011 Oct 27;6(10):e26502. doi: 10.1371/journal.pone.0026502 (PMC3203153; doi:10.1371/journal.pone.0026502)
Supplement: Table S7 — Target genes which have conserved miRNA binding sites. (XLS) [file pone.0026502.s012.xls]

## Sheet: Sheet1
Table S7. Regulation pattern based on conserved miRNA binding sites.
Gene symbol	Regulation value	Regulation pattern1
BCL6	220.54	1
CUGBP2	37.5	1
NXF1	31.42	1
CALM1	30.15	1
CPEB3	29.22	1
PPAP2B	26.74	1
PTPN12	26.41	1
RAB27A	26.35	1
GJC1	23.69	1
SHANK2	23.65	1
PIGA	23.62	1
SORT1	22.69	1
ACVR2A	21.8	1
THBS1	21.59	1
S1PR1	21.58	1
MEIS1	20.25	1
YAF2	19.62	1
SMAD6	19.61	1
SFRS6	19.16	1
AMOTL2	18.99	1
CREBL2	18.96	1
PBX3	18.47	1
AHCYL1	17.38	1
CAST	16.13	1
C15orf57	15.99	1
CCND3	15.68	1
CADM1	14.82	1
OTUD4	14.73	1
RIMS3	14.03	1
SLC23A2	13.6	1
RAB31	12.96	1
MTMR12	12.03	1
LOC162073	11.99	1
RHOB	11.89	1
DKK2	11.77	1
KIAA0247	11.65	1
PLAGL1	11.54	1
TLN1	11.44	1
KIAA1033	11.34	1
EVI5	11.23	1
RHOG	11.22	1
ADAMTS1	11.01	1
NR1H2	10.91	1
NUMA1	10.91	1
DAB2	10.88	1
PLDN	10.77	1
KMO	10.77	1
RBPJ	10.71	1
AQP4	10.29	1
TMEM87A	10.14	1
JUND	9.91	1
AK1	9.91	1
CD37	9.91	1
PSCD2	9.91	1
KDSR	9.84	1
TSC22D1	9.81	1
VAT1	9.62	1
ANKRD28	9.45	1
CLN5	9	1
ANK2	8.87	1
CAT	8.82	1
PLN	8.78	1
MSN	8.66	1
ZZEF1	8.65	1
MAGI1	8.46	1
SNX1	8.38	1
SH2B3	8.28	1
ITPR1	8.25	1
ITGA5	8.2	1
EDEM1	8.2	1
RPL15	8.1	1
RDX	8.02	1
UTRN	7.85	1
ATF3	7.78	1
TEGT	7.76	1
BZRAP1	7.62	1
CDH6	7.51	1
LATS2	7.51	1
SDC4	7.48	1
MTMR6	7.45	1
RAP1A	7.43	1
EFEMP1	7.43	1
GAS7	7.38	1
SPTAN1	7.35	1
CALCRL	7.26	1
ESR1	7.23	1
DNASE1L3	7.2	1
MAP3K14	7.2	1
ILK	7.2	1
MID1IP1	7.19	1
FAM164C	6.93	1
GRK6	6.93	1
RSU1	6.93	1
RBM5	6.93	1
ANXA11	6.93	1
CTDP1	6.71	1
INPP5A	6.7	1
SLC2A3	6.57	1
CCNG1	6.42	1
KIAA0141	6.38	1
NFIL3	6.25	1
KLF2	6.25	1
AUH	6.25	1
SUCLG2	6.25	1
MAT2A	6.1	1
CP110	6.05	1
RND1	6.04	1
CPM	5.92	1
LMO2	5.9	1
ENPP4	5.81	1
BHLHB2	5.77	1
SFRS5	5.73	1
LRIG1	5.59	1
NFKB1	5.09	1
WDR42A	4.87	1
CCPG1	4.86	1
RGS5	4.51	1
MGLL	4.51	1
PLEKHM2	4.51	1
PTGIS	4.38	1
PRKAR1A	4.37	1
MYO5B	4.36	1
ZNF330	4.31	1
HNRNPU	4.15	1
IKBKAP	4	1
MYADM	3.86	1
TIMP2	3.79	1
CANX	3.7	1
ID4	3.62	1
ATXN2	3.13	1
ANAPC4	3.12	1
ASAH1	3.12	1
IL13RA1	3	1
PDE4B	2.97	1
SNX30	2.91	1
PITPNA	2.89	1
RAPGEF1	2.69	1
TRAK1	2.43	1
RUFY1	2.42	1
GGA2	2.42	1
FLRT3	1.99	1
RHOA	1.86	1
KLF11	1.83	1
DAPK1	1.79	1
DDX5	1.75	1
SEMA3E	1.63	1
C6orf225	1.53	1
PTGER4	1.53	1
BRI3	1.53	1
LBA1	1.47	1
ARHGEF7	1.36	1
FBXL5	1.33	1
KIAA0323	1.18	1
TRIM3	1.18	1
PTGFR	1.18	1
PLEKHB2	1.18	1
LAPTM5	1.18	1
ARHGEF10	1.18	1
LHFPL2	1	1
TPM2	1	1
KANK2	0.98	1
NKTR	0.61	1
PCYOX1	0.58	1
RRM2B	0.46	1
RHOQ	0.45	1
ATP6V1B2	0.28	1
IL10RA	0.28	1
MSRB3	0.27	1
DAGLA	0.12	1
DCN	0.08	1
ANXA4	0.08	1
TCFL5	-0.01	1
COL5A2	-0.09	1
KIF14	-0.2	1
MINA	-0.2	1
PDIA6	-0.2	1
DDX52	-0.2	1
E2F5	-0.2	1
SRM	-0.22	1
LOX	-0.72	1
GPR56	-0.73	1
TMEM183B	-1.38	1
SUZ12	-1.55	1
FAM135B	-1.81	1
RBM16	-3.06	1
PREB	-3.07	1
SLC30A3	-3.29	1
CNPY2	-4.42	1
COCH	-4.42	1
ARL6IP1	-4.43	1
TMTC4	-5.12	1
STK39	-7.12	1
OPRK1	-8.16	1
EIF4G3	-8.24	1
RND2	-11.34	1
SRPK1	-33.4	1
ATP11A	-64.42	1
ABCC5	141.13	2
GREM1	17.26	2
FAM118A	17.25	2
NFASC	16.98	2
SULF1	15.91	2
FOXD1	15.81	2
LRRCC1	15.56	2
ATAD2	14.64	2
DPH2	14.64	2
PAWR	14.64	2
AHCTF1	13.39	2
ACPL2	13.08	2
SLC6A6	12.68	2
COL1A2	12.41	2
AK3L1	11.72	2
WDTC1	11.4	2
ZNF212	10.91	2
PVRL1	10.79	2
MYT1	10.77	2
PARP1	10.71	2
KLF7	10.27	2
ICK	9.34	2
PPAT	9.19	2
IGSF3	7.91	2
MTMR4	7.37	2
FOXRED2	6.93	2
PRC1	6.93	2
CHST10	6.93	2
MTFR1	6.75	2
KIAA0907	6.56	2
WDR33	6.25	2
BNIP3	6.25	2
TCEB3	6.25	2
LRP4	5.91	2
UBE2V2	5.82	2
GCG	5.17	2
HP1BP3	4.85	2
COIL	4.19	2
ORC1L	4	2
CPT1A	4	2
SOS2	3.33	2
AMMECR1	3.25	2
RHOBTB3	3.15	2
ODZ4	2.41	2
ZNF318	2.26	2
ZNF436	2.06	2
HOXB7	1.49	2
RRM1	1.18	2
EZH2	0.8	2
PPP2R5D	0.63	2
CD55	-0.01	2
TNFSF15	-0.01	2
B2M	-0.01	2
BCAR3	-0.01	2
TRIM13	-0.01	2
XPA	-0.01	2
CD44	-0.2	2
HIVEP1	-0.2	2
CHRNA5	-0.2	2
GYPC	-0.2	2
BCAP29	-0.2	2
STOM	-0.2	2
TMED5	-0.2	2
FGFR4	-0.2	2
P2RY14	-0.2	2
MYO9A	-0.2	2
CDO1	-0.2	2
CYBB	-0.2	2
SAT1	-0.2	2
SLC12A4	-0.22	2
LIFR	-0.34	2
MXD4	-0.37	2
UIMC1	-0.38	2
PMP22	-0.43	2
ALOX5AP	-0.51	2
CX3CL1	-0.51	2
C1QA	-0.51	2
ABR	-0.55	2
SH3BGRL	-0.55	2
KLF6	-0.59	2
GNS	-0.71	2
VIM	-0.72	2
KIF13B	-0.72	2
GLIS3	-0.92	2
HSPB8	-0.95	2
CLDN11	-0.95	2
PSAP	-0.95	2
RASD1	-0.95	2
GBF1	-1.05	2
ST8SIA1	-1.17	2
IFIT5	-1.21	2
CAMK1	-1.38	2
MAN2A2	-1.38	2
PIAS1	-1.38	2
NR3C2	-1.38	2
MAFF	-1.38	2
BPGM	-1.49	2
CACNA2D2	-1.51	2
PSCD4	-1.54	2
KCNE3	-1.57	2
FOXF1	-1.66	2
SPG20	-1.7	2
FAM54B	-1.77	2
CLDN18	-1.88	2
PRKCD	-1.89	2
VASP	-1.9	2
PTK2B	-2.05	2
SPAG6	-2.05	2
SNX2	-2.05	2
SLC11A1	-2.05	2
PTPRU	-2.05	2
SERPINF2	-2.07	2
BMP2	-2.2	2
DIAPH1	-2.69	2
AMN1	-2.78	2
PDE2A	-2.78	2
RCAN2	-2.94	2
SBNO2	-3.06	2
ADD1	-3.06	2
PRKCZ	-3.06	2
ADAMTS8	-3.06	2
PHTF1	-3.06	2
TCEAL1	-3.06	2
MTHFR	-3.07	2
NCOR2	-3.07	2
HEBP1	-3.07	2
AXL	-3.07	2
TXNDC11	-3.07	2
CRBN	-3.26	2
PTPRM	-3.28	2
DDX17	-3.38	2
IQGAP1	-3.55	2
EGR1	-3.71	2
SLC7A2	-3.8	2
PLCXD3	-3.85	2
FOSB	-4.02	2
ARHGEF17	-4.17	2
MYH9	-4.24	2
ECM2	-4.42	2
ADPRH	-4.42	2
TPK1	-4.42	2
PRKCQ	-4.42	2
IGSF6	-4.42	2
TFPI2	-4.42	2
DZIP3	-4.62	2
AKAP13	-4.62	2
NR4A2	-4.63	2
SLC26A2	-4.63	2
DUSP3	-4.77	2
BTN3A2	-4.87	2
ATP6V1E1	-4.87	2
FGD3	-4.87	2
BTG2	-4.89	2
ARNT	-4.98	2
ARL6IP5	-5.07	2
GNAI2	-5.27	2
GAB2	-5.36	2
LITAF	-5.49	2
GFRA2	-5.91	2
MEF2D	-6.14	2
JUN	-6.48	2
PIK3C2B	-6.99	2
RBPMS	-7.29	2
SERTAD1	-7.29	2
CD83	-7.49	2
TPPP3	-7.51	2
DNAJB12	-8.01	2
ATP2B4	-8.13	2
PPARG	-8.68	2
PSCD1	-8.84	2
AHCYL2	-9.49	2
ZFYVE16	-9.55	2
C14orf43	-10.18	2
WDR7	-10.33	2
SEPP1	-11.71	2
C10orf26	-11.88	2
SORBS1	-12.47	2
OGN	-12.69	2
MFAP4	-21.53	2
GPM6A	-48.84	2
PRKCE	-52.35	2
YWHAH	-57.33	2
ARIH2	-58.57	2
CXCL12	-59.15	2
RALGDS	-60.9	2
CACNA2D1	-62.34	2
SARM1	-62.34	2
C11orf58	-62.85	2
VAPA	-66.96	2
RASSF1	-75.03	2
ESPL1	0	3
LOC649217	0	3
LOC650185	0	3
LOC642452	0	3
LOC728477	0	3
LOC729952	0	3
LOC650463	0	3
LOC644131	0	3
TIGD7	0	3
DUS2L	0	3
EIF6	0	3
LOC645879	0	3
LOC339789	0	3
LOC651697	0	3
ACSS1	0	3
KLK14	0	3
LOC641901	0	3
LOC652799	0	3
TOP1MT	0	3
LOC649340	0	3
SLC39A4	0	3
FNDC4	0	3
LOC100134794	0	3
CCNB1	0	3
LOC651728	0	3
ZSWIM1	0	3
OR56A3	0	3
SCYL2	0	3
CCDC28B	0	3
OSTC	0	3
NBPF5	0	3
LOC255130	0	3
ZMYND19	0	3
LOC645166	0	3
LOC654000	0	3
ASPM	0	3
TTLL12	0	3
SPOCK	0	3
SLC12A8	0	3
LOC100133638	0	3
IPO9	0	3
LOC728692	0	3
LOC646956	0	3
LOC644856	0	3
LOC653782	0	3
LOC100131722	0	3
LOC441018	0	3
LOC100129950	0	3
MRPS14	0	3
LOC653610	0	3
LOC402457	0	3
VKORC1L1	0	3
DHRS11	0	3
PLEK2	0	3
MIR584	0	3
LOC100134018	0	3
LOC643918	0	3
GEN1	0	3
GBL	0	3
FLJ30594	0	3
LOC643995	0	3
LOC645268	0	3
TOP3B	0	3
TIMM9	0	3
CPSF1	0	3
LOC644291	0	3
SLC5A6	0	3
LOC339240	0	3
CNIH2	0	3
MRM1	0	3
ADM2	0	3
LOC400855	0	3
LOC401074	0	3
LOC652588	0	3
LOC100131565	0	3
LOC391165	0	3
RPP40	0	3
LOC729296	0	3
LOC647713	0	3
LOC100128264	0	3
FLJ43505	0	3
C15orf42	0	3
DEFB116	0	3
LOC728846	0	3
LOC100132553	0	3
YIPF4	0	3
KBTBD9	0	3
MIR1228	0	3
SNORD110	0	3
LOC652324	0	3
CCDC124	0	3
STARD5	0	3
LOC646812	0	3
IZUMO1	0	3
LOC651729	0	3
ZC3H8	0	3
MGC33948	0	3
MIR1249	0	3
MIR488	0	3
DLX6AS	0	3
FBLIM1	0	3
LOC343927	0	3
LRRC8D	0	3
FOXM1	0	3
C16orf91	0	3
ZNF132	0	3
MSH6	0	3
LOC340243	0	3
POLR2F	0	3
HNRPA2B1	0	3
LOC651520	0	3
F8A1	0	3
CYP2C18	0	3
LOC650822	0	3
LOC100128283	0	3
LOC649246	0	3
PRY	0	3
LOC641992	0	3
LOC100132934	0	3
ENY2	0	3
HIST1H3B	0	3
PRR19	0	3
LOC440067	0	3
LOC100131785	0	3
FLJ45300	0	3
LOC644101	0	3
FDXACB1	0	3
KIF11	0	3
LOC729272	0	3
LOC643714	0	3
LOC647370	0	3
RPL34	0	3
LOC641772	0	3
NOD3	0	3
DKFZp686I15217	0	3
PTH2R	0	3
LOC92659	0	3
LOC728098	0	3
HM13	0	3
LOC644516	0	3
LOC389049	0	3
DBNDD1	0	3
UBE2O	0	3
MRPL2	0	3
LOC644695	0	3
LOC131055	0	3
LOC100133422	0	3
LOC648541	0	3
ASF1B	0	3
LOC729057	0	3
TOP2A	0	3
LOC643266	0	3
FARSLA	0	3
LOC146481	0	3
SNX6	0	3
LOC641298	0	3
PTENP1	0	3
CCT8	0	3
HDDC3	0	3
LOC100132289	0	3
GJB2	0	3
WDR72	0	3
LOC643304	0	3
LOC653275	0	3
CCHCR1	0	3
LOC345537	0	3
LOC652685	0	3
WDR75	0	3
LOC650370	0	3
LOH12CR2	0	3
LRFN3	0	3
ATRIP	0	3
GPR19	0	3
HELLS	0	3
TRNT1	0	3
LOC126987	0	3
LOC653557	0	3
ARD1A	0	3
LOC645462	0	3
LOC440349	0	3
THNSL1	0	3
SUV39H2	0	3
PIGS	0	3
LMBR1L	0	3
FLJ16165	0	3
MGC12966	0	3
LOC646882	0	3
NOTUM	0	3
GUF1	0	3
HOXB13	0	3
LOC652404	0	3
KCNU1	0	3
DEFB105B	0	3
INPP5J	0	3
LOC648454	0	3
L2HGDH	0	3
LOC642938	0	3
TGS1	0	3
LOC651467	0	3
TSEN34	0	3
SAC3D1	0	3
LOC400954	0	3
TPBG	0	3
BPIL3	0	3
ZNF322B	0	3
GJB3	0	3
RCC2	0	3
ANKLE1	0	3
GGCT	0	3
LOC100128525	0	3
LOC387762	0	3
FAM158A	0	3
NOMO2	0	3
DNAJC3	0	3
INHBE	0	3
SLC29A1	0	3
LOC653198	0	3
LOC728150	0	3
LOC441459	0	3
ABHD15	0	3
NLGN2	0	3
CANT1	0	3
LIN9	0	3
FLJ46358	0	3
DSG3	0	3
NFS1	0	3
MIR16-1	0	3
C17orf53	0	3
DHFR	0	3
MAD2L1	0	3
INTS2	0	3
CST9	0	3
FLJ13096	0	3
LOC644667	0	3
LOC442064	0	3
FAM3A	0	3
NR2F6	0	3
TMX1	0	3
GAGE12C	0	3
SALL4	0	3
C12orf45	0	3
LOC650029	0	3
RAD51AP1	0	3
LOC100133012	0	3
LOC100134517	0	3
TCAM1	0	3
NACC1	0	3
LOC653514	0	3
GNAT3	0	3
EIF3S3	0	3
RAB6C	0	3
PRSS16	0	3
EARS2	0	3
CFHR2	0	3
FLJ00312	0	3
OR1F1	0	3
ALG6	0	3
LOC644048	0	3
DUS4L	0	3
CARD14	0	3
KIF1A	0	3
RCOR2	0	3
LOC650834	0	3
NVL	0	3
TAS2R46	0	3
LOC728148	0	3
LOC100128731	0	3
DYNLL2	0	3
CABYR	0	3
TMEM128	0	3
LOC645982	0	3
CLCN2	0	3
PAFAH1B3	0	3
LOC441314	0	3
LOC388237	0	3
PTTG3P	0	3
SEC15L2	0	3
MUC5B	0	3
MIR448	0	3
C6orf173	0	3
LOC730107	0	3
CYHR1	0	3
PMS2CL	0	3
NFRKB	0	3
DEAF1	0	3
LOC442519	0	3
FLJ12886	0	3
LOC388906	0	3
LOC646691	0	3
MARCKSL1	0	3
TBC1D3B	0	3
LOC100134055	0	3
FLJ16331	0	3
HTA	0	3
MPHOSPH9	0	3
LOC644320	0	3
HMMR	0	3
CCDC54	0	3
LOC100130344	0	3
LOC284352	0	3
LOC645875	0	3
LOC402100	0	3
LOC128192	0	3
LOC100134393	0	3
KCTD13	0	3
LOC644647	0	3
XRCC3	0	3
ITPKA	0	3
FBXL20	0	3
KLHL26	0	3
SCYL1BP1	0	3
CNTNAP3B	0	3
PATE3	0	3
MGC72080	0	3
RFNG	0	3
LOC649722	0	3
YDJC	0	3
LOC730058	0	3
LOC648517	0	3
POLR1A	0	3
SLC39A9	0	3
LOC727880	0	3
LOC648164	0	3
ZMIZ2	0	3
ETV4	0	3
SNORA33	0	3
LOC145837	0	3
FLJ40672	0	3
LOC100129619	0	3
AOF1	0	3
LOC647243	0	3
KLHL17	0	3
LOC651576	0	3
LOC100134029	0	3
LOC647541	0	3
LOC646780	0	3
XKRX	0	3
LOC653238	0	3
HDAC1	0	3
RAD51C	0	3
LOC100131124	0	3
ULK3	0	3
LOC100134301	0	3
LOC100132516	0	3
LOC645876	0	3
GCN5L2	0	3
SNORD74	0	3
SNORA73A	0	3
LOC388642	0	3
LOC440157	0	3
RMST	0	3
AOF2	0	3
DHTKD1	0	3
MORC2	0	3
LOC652126	0	3
LOC642834	0	3
LOC100132724	0	3
NOC2L	0	3
LOC647156	0	3
NIPAL1	0	3
C12orf60	0	3
DSN1	0	3
LOC642398	0	3
CERCAM	0	3
WRNIP1	0	3
CDK4	0	3
COL24A1	0	3
ZNF30	0	3
SFT2D2	0	3
CDCA7	0	3
GPT2	0	3
C11orf84	0	3
TMEM106C	0	3
LOC729950	0	3
MELK	0	3
PPFIA4	0	3
LOC652227	0	3
SDCCAG1	0	3
PYGO2	0	3
C1orf163	0	3
GRTP1	0	3
SNORA72	0	3
LOC651554	0	3
R3HDM1	0	3
LOC146909	0	3
WDYHV1	0	3
CENPN	0	3
GLTPD1	0	3
CSRP2BP	0	3
LOC650638	0	3
XYLT2	0	3
LOC643109	0	3
SC65	0	3
CTHRC1	0	3
LOC727781	0	3
C14orf2	0	3
ERI2	0	3
ZNF324B	0	3
DKC1	0	3
LOC392221	0	3
HNRNPCL1	0	3
GALNT1	0	3
PNMA3	0	3
C6orf79	0	3
LOC644094	0	3
LOC388438	0	3
LOC220729	0	3
LOC645194	0	3
LOC647104	0	3
PSCA	0	3
RECQL4	0	3
CXorf64	0	3
VARS2	0	3
CEP72	0	3
LOC644023	0	3
SNORA73B	0	3
MGC4655	0	3
H2AFZ	0	3
LOC441241	0	3
RFC4	0	3
LOC646993	0	3
OIP5	0	3
LOC653387	0	3
CCNA2	0	3
C16orf52	0	3
TTK	0	3
TMEM132A	0	3
NIPAL2	0	3
PGM3	0	3
LOC650321	0	3
LOC100132880	0	3
BAIAP2L2	0	3
LOC652290	0	3
LOC391859	0	3
GAD1	0	3
C12orf32	0	3
LOC644214	0	3
LOC100132883	0	3
HCN3	0	3
TIGD5	0	3
EXOSC5	0	3
LOC100134774	0	3
LOC652288	0	3
TWIST1	0	3
RBM28	0	3
LOC653229	0	3
LOC440160	0	3
ADCK5	0	3
MSTO1	0	3
ZNF696	0	3
FLJ21816	0	3
TSPAN5	0	3
LAPTM4B	0	3
GYLTL1B	0	3
C17orf56	0	3
MMP1	0	3
C11orf83	0	3
C17orf106	0	3
ZNF260	0	3
LOC283278	0	3
LOC653890	0	3
TROAP	0	3
LOC440258	0	3
LOC729960	0	3
LOC389901	0	3
MMP12	0	3
CDCA5	0	3
LOC648609	0	3
UBE2T	0	3
TMEM206	0	3
LMBR1	0	3
LOC645885	0	3
MLC1SA	0	3
LOC651655	0	3
C1orf43	0	3
RECQL5	0	3
EPCAM	0	3
FGF23	0	3
LOC653108	0	3
TMEM54	0	3
LOC346545	0	3
CATSPER2P1	0	3
CCDC47	0	3
LOC100133578	0	3
SPRR1B	0	3
ISG15	0	3
C14orf21	0	3
MX2	0	3
LOC100134719	0	3
RDM1	0	3
C16orf78	0	3
PCSK1N	0	3
PMS2	0	3
GRIP2	0	3
LOC100134167	0	3
TMEM4	0	3
ABHD1	0	3
PHLPP1	0	3
LOC651914	0	3
LOC100129566	0	3
LOC652757	0	3
GPR31	0	3
UNQ9391	0	3
MMP11	0	3
LOC100129827	0	3
NPDC1	0	3
FAM38B	0	3
ABCA3	0	3
ERGIC1	0	3
ATOX1	0	3
PTPLA	0	3
TSPAN32	0	3
PKNOX2	0	3
UGCG	0	3
RNF122	0	3
LOC387763	0	3
VAMP8	0	3
LOC400236	0	3
FAM65A	0	3
HSPB6	0	3
CSPG4	0	3
CYBA	0	3
NCF1C	0	3
FLJ21062	0	3
ZNF364	0	3
LOC652421	0	3
PPP1R14A	0	3
FRMD3	0	3
AMICA1	0	3
CD300C	0	3
ATP9B	0	3
PMS2L4	0	3
MYO9B	0	3
LOC643595	0	3
WISP2	0	3
RENBP	0	3
RTN1	0	3
LOC100129534	0	3
C1QC	0	3
NSMCE4A	0	3
DNAI1	0	3
PRKCDBP	0	3
C4orf22	0	3
CAPN3	0	3
USP47	0	3
LOC653506	0	3
NCRNA00081	0	3
C17orf91	0	3
LOC644994	0	3
CYTH1	0	3
ECHDC1	0	3
TRK1	0	3
LOC644365	0	3
FGR	0	3
CYTSA	0	3
AQP9	0	3
CD4	0	3
SQRDL	0	3
LOC400163	0	3
IRF1	0	3
ING3	0	3
SSH2	0	3
LOC643165	0	3
PRAM1	0	3
LOC643384	0	3
KNDC1	0	3
FLJ37970	0	3
EPDR1	0	3
MUSK	0	3
MYO3B	0	3
ZFYVE1	0	3
ALOX5	0	3
MNS1	0	3
GPR162	0	3
NLRP3	0	3
ZFP3	0	3
RGS16	0	3
C14orf85	0	3
CLN8	0	3
STX8	0	3
CRY2	0	3
LOC440280	0	3
HCST	0	3
LIPN	0	3
PDLIM7	0	3
C5AR1	0	3
ARHGAP30	0	3
LOC256374	0	3
SLCO2B1	0	3
MPPE1	0	3
KIAA1683	0	3
ANXA3	0	3
CENTD2	0	3
LOC644624	0	3
ZMYND15	0	3
NFATC1	0	3
LRRC8C	0	3
BIN3	0	3
RPS23	0	3
LOC100133233	0	3
TEKT1	0	3
HNRPUL2	0	3
C14orf45	0	3
C15orf52	0	3
LOC400713	0	3
LOC729970	0	3
FLJ11286	0	3
TAPBPL	0	3
DICER1	0	3
ZNF148	0	3
LRRC16	0	3
LOC131873	0	3
FYCO1	0	3
GIMAP1	0	3
SULT1A4	0	3
GRAMD2	0	3
UFM1	0	3
DACT3	0	3
SRI	0	3
HLA-E	0	3
ALDH2	0	3
LMOD3	0	3
RNASEK	0	3
LOC388259	0	3
FAS	0	3
QDPR	0	3
MOSPD2	0	3
LOC126767	0	3
MGST3	0	3
MGC26356	0	3
UBA7	0	3
GRIPAP1	0	3
SOD3	0	3
LOC643597	0	3
ULK4	0	3
DUXAP3	0	3
GDF10	0	3
BTN3A1	0	3
LAMP3	0	3
SLC16A5	0	3
CLEC2B	0	3
RARRES3	0	3
GLTSCR2	0	3
PTPNS1	0	3
LOC653697	0	3
PPM1K	0	3
LOC100128510	0	3
ENOSF1	0	3
LRAP	0	3
SERPING1	0	3
TICAM2	0	3
FOXD4L1	0	3
NFKB2	0	3
LOC645013	0	3
ARL13B	0	3
LOC647389	0	3
FAM82A2	0	3
LOC100128098	0	3
LOC100129268	0	3
FCN1	0	3
LOC442308	0	3
C8orf48	0	3
PPP1R9A	0	3
NCF2	0	3
BCAM	0	3
HLA-DRA	0	3
LOC132707	0	3
DEM1	0	3
ADORA2A	0	3
WDR19	0	3
ZNF331	0	3
DKFZp781N1041	0	3
EXOC2	0	3
P76	0	3
FUCA2	0	3
FKBP14	0	3
LOC144363	0	3
RNF145	0	3
MRGPRF	0	3
LY86	0	3
IGFALS	0	3
LOC646365	0	3
LOC100133242	0	3
DPYD	0	3
RASGRP2	0	3
CFH	0	3
FUT6	0	3
EML3	0	3
LOC390364	0	3
LOC647020	0	3
WTIP	0	3
FOLR1	0	3
ARID5B	0	3
FLNC	0	3
FERMT3	0	3
LOC100134144	0	3
PILRA	0	3
CST3	0	3
WDR6	0	3
NTE	0	3
TM6SF1	0	3
LOC100134291	0	3
CD53	0	3
GCA	0	3
CORO2B	0	3
CLEC3B	0	3
AKNA	0	3
NUPR1	0	3
LOC653158	0	3
POM121L1P	0	3
CAPN9	0	3
ITGA8	0	3
LOC100128591	0	3
LPXN	0	3
MT1M	0	3
SERPINA1	0	3
TNNC1	0	3
TTC18	0	3
ARHGAP15	0	3
IL1RL1	0	3
DOCK11	0	3
RASEF	0	3
STAT5A	0	3
KRTAP10-1	0	3
MIR122	0	3
BZRPL1	0	3
OR2A9P	0	3
MCEMP1	0	3
C1orf21	0	3
KRTHB5	0	3
LRRC25	0	3
PTGER1	0	3
CCDC48	0	3
DNAH1	0	3
LOC284964	0	3
TAAR3	0	3
DUSP18	0	3
TNFSF12	0	3
HK3	0	3
LOC392437	0	3
RSPO2	0	3
CHST13	0	3
LOC100128126	0	3
C5orf4	0	3
IFIT2	0	3
LOC284274	0	3
USPL1	0	3
CYP4V2	0	3
ASTE1	0	3
NKG7	0	3
MIR376A2	0	3
TJP3	0	3
MT1G	0	3
KIAA1202	0	3
HCK	0	3
LOC646947	0	3
SNORD69	0	3
ACCS	0	3
LOC100130417	0	3
LOC645897	0	3
ABCA8	0	3
LOC100129905	0	3
PPM1M	0	3
LOC124446	0	3
RRAD	0	3
CD151	0	3
LEPROT	0	3
SLC22A1	0	3
STEAP4	0	3
TXNRD2	0	3
FES	0	3
AOC3	0	3
SLC46A2	0	3
LOC650737	0	3
GJA4	0	3
SLC27A1	0	3
S100A3	0	3
PLA1A	0	3
TTC25	0	3
TRPV2	0	3
C20orf114	0	3
C9orf7	0	3
FTH1	0	3
KIAA1666	0	3
KIAA1407	0	3
LOC643242	0	3
LCN15	0	3
FLJ22222	0	3
CTSS	0	3
LOC100133567	0	3
COL6A2	0	3
LILRA2	0	3
FBLN1	0	3
C20orf56	0	3
MAP3K8	0	3
LOC650689	0	3
LOC653686	0	3
TCF21	0	3
HIST2H3D	0	3
LOC648403	0	3
STOML3	0	3
C6orf60	0	3
CD248	0	3
CACNA1H	0	3
LOC641964	0	3
ZYX	0	3
SULT1A1	0	3
SH3KBP1	0	3
LOC100129165	0	3
UPK3B	0	3
LOC100128556	0	3
SYT15	0	3
LDLR	0	3
TNFAIP8L3	0	3
PRMT8	0	3
TLR8	0	3
HLA-DOA	0	3
KLHL28	0	3
LOC284293	0	3
FAM90A18	0	3
IL8	0	3
ARHGEF3	0	3
NTN4	0	3
WFIKKN1	0	3
AP1M1	0	3
SLIT3	0	3
NFKBIZ	0	3
RAB20	0	3
PPOX	0	3
LOC643009	0	3
DYDC2	0	3
ATG7	0	3
LOC653733	0	3
SLAMF8	0	3
BRI3P1	0	3
ARSB	0	3
SDR16C5	0	3
STX11	0	3
PLAC9	0	3
TBXAS1	0	3
LOC642194	0	3
SLC36A4	0	3
MYH11	0	3
LRRC50	0	3
PTGS2	0	3
NICN1	0	3
OLR1	0	3
GLIPR2	0	3
MTE	0	3
SLPI	0	3
CYB561D2	0	3
CFC1	0	3
ANKHD1-EIF4EBP3	0	3
ZFYVE20	0	3
SAT2	0	3
HOXA5	0	3
CDC42EP2	0	3
TRIM56	0	3
FIS1	0	3
C3orf29	0	3
TLR5	0	3
LOC646354	0	3
LOC648856	0	3
HRIHFB2122	0	3
FCGR3A	0	3
LOC387931	0	3
CLIP2	0	3
MOBKL2A	0	3
SLITL2	0	3
GGT3	0	3
MIDN	0	3
ZNF533	0	3
HEXB	0	3
CD97	0	3
FLJ37543	0	3
TMEM77	0	3
EBF1	0	3
NINJ2	0	3
CD300LG	0	3
MPHOSPH8	0	3
MSR1	0	3
COL4A3BP	0	3
C6orf97	0	3
SLC30A7	0	3
KDM6B	0	3
TM7SF4	0	3
IL15	0	3
LOC100133172	0	3
LAT2	0	3
PLEKHO2	0	3
PRF1	0	3
WDR49	0	3
LST1	0	3
HSGT1	0	3
ZNF790	0	3
VSIG4	0	3
AGTR1	0	3
FLJ23049	0	3
TNFRSF19	0	3
LOC652769	0	3
TNFAIP8L1	0	3
LOC728903	0	3
KCNH6	0	3
LOC647786	0	3
TRIB1	0	3
LOC442465	0	3
LENG8	0	3
LOC643564	0	3
LOC643147	0	3
ICOSLG	0	3
C8orf78	0	3
ITGB2	0	3
PHPT1	0	3
TEKT2	0	3
PROS1	0	3
MAP6	0	3
POR	0	3
CTSD	0	3
C20orf46	0	3
PLEKHH2	0	3
LOC392787	0	3
LOC283267	0	3
C10orf10	0	3
GIMAP6	0	3
PPP1R12C	0	3
LOC653080	0	3
ZNF780B	0	3
MAN2C1	0	3
TINF2	0	3
MPDU1	0	3
RBPMS2	0	3
FLJ20433	0	3
C17orf87	0	3
SH3TC1	0	3
FRMD4A	0	3
C8orf34	0	3
TMEM207	0	3
SOCS3	0	3
BHLHB3	0	3
RNPC3	0	3
LOC644700	0	3
VWA3A	0	3
ALPK1	0	3
ARID1B	0	3
HYDIN	0	3
SIRPD	0	3
GUSBL1	0	3
MIR421	0	3
C21orf2	0	3
HOXD1	0	3
DYNLRB2	0	3
LOC494141	0	3
RSHL3	0	3
C6orf189	0	3
LOC441773	0	3
MIR21	0	3
LOC100130663	0	3
LOC642302	0	3
KIR2DL1	0	3
C9orf135	0	3
MCL1	0	3
GBP4	0	3
LILRA5	0	3
CCL2	0	3
FARS2	0	3
RUTBC1	0	3
DAD1L	0	3
NNMT	0	3
LOC641825	0	3
TRIP10	0	3
FILIP1	0	3
FAM149B1	0	3
C9orf117	0	3
LOC440498	0	3
LRRFIP1	0	3
ABI3	0	3
TBC1D10A	0	3
CDH29	0	3
ANXA5	0	3
LRRC36	0	3
LOC642243	0	3
IL18RAP	0	3
C20orf28	0	3
REEP1	0	3
SETD3	0	3
LOC100133737	0	3
SPIN2	0	3
CD68	0	3
FLJ10213	0	3
GHDC	0	3
FAM179A	0	3
LOC647924	0	3
TMEM100	0	3
SLC22A3	0	3
GADD45B	0	3
ACER3	0	3
BBX	0	3
TRSPAP1	0	3
TSRC1	0	3
LOC54103	0	3
EDG6	0	3
HLA-DRB6	0	3
PLXNA4	0	3
CCRL2	0	3
FPR1	0	3
LOC646100	0	3
LOC100128093	0	3
GLCCI1	0	3
KIAA0040	0	3
CLK1	0	3
CD14	0	3
HSD3B7	0	3
ACE	0	3
SLC35A4	0	3
PHAX	0	3
FLJ44054	0	3
IFT74	0	3
RILPL2	0	3
STK10	0	3
FAM63A	0	3
TAGLN	0	3
PARVG	0	3
EMCN	0	3
ZNF676	0	3
FIG4	0	3
ENG	0	3
LOC149620	0	3
C6orf211	0	3
IFFO1	0	3
KIAA1324L	0	3
PTTG1IP	0	3
SIGIRR	0	3
OGT	0	3
FAM119A	0	3
OBSL1	0	3
TCF7L1	0	3
PPP1R15A	0	3
FCGR2A	0	3
LOC100134440	0	3
CCDC84	0	3
LOC401286	0	3
CECR1	0	3
GZMH	0	3
SCAPER	0	3
UGT2A2	0	3
DENND5A	0	3
PKIG	0	3
TYROBP	0	3
LOC649317	0	3
CMAH	0	3
OSCAR	0	3
ASAM	0	3
PECAM1	0	3
MYD88	0	3
PTPN1	0	3
MIR1227	0	3
LRRC32	0	3
LOC100130513	0	3
LOC88523	0	3
LOC286478	0	3
ZYG11B	0	3
NALP1	0	3
PARP12	0	3
PNRC2	0	3
CYP4X1	0	3
KIAA0913	0	3
SCARA5	0	3
PPP3CB	0	3
ARHGAP18	0	3
C9orf72	0	3
MAOB	0	3
TCEAL2	0	3
LOC653746	0	3
HMHA1	0	3
LOC100130902	0	3
IGSF10	0	3
PKN3	0	3
C15orf26	0	3
LOC653344	0	3
LOC650346	0	3
GRASP	0	3
SCGB1A1	0	3
MFGE8	0	3
C9orf21	0	3
SP110	0	3
LOC100132386	0	3
S100A4	0	3
CRH	0	3
ACP5	0	3
CA4	0	3
SLC24A6	0	3
LOC100131786	0	3
SDCBP	0	3
LOC728711	0	3
CTRC	0	3
GRIK1	0	3
PHCA	0	3
ICAM4	0	3
ANAPC2	0	3
LRP1	0	3
RIPK3	0	3
LOC100133972	0	3
C9orf144B	0	3
ADHFE1	0	3
LOC646279	0	3
SPI1	0	3
LOC400451	0	3
SYNC1	0	3
TREM2	0	3
C1orf158	0	3
TPP1	0	3
LRRC23	0	3
LOC652541	0	3
RASL12	0	3
FMNL3	0	3
C15orf5	0	3
CXorf6	0	3
ZMAT1	0	3
GP9	0	3
LOC197135	0	3
LOC402176	0	3
FLJ43879	0	3
GSTK1	0	3
LOC100133772	0	3
IL3RA	0	3
SEC22C	0	3
CHI3L2	0	3
UTP3	0	3
REEP5	0	3
C6orf224	0	3
CSGALNACT1	0	3
STX12	0	3
IL17R	0	3
RPL23AP53	0	3
SYK	0	3
SERPINB1	0	3
STAB1	0	3
GPR152	0	3
MXRA7	0	3
LGALS3	0	3
OSR1	0	3
SLC22A15	0	3
GIMAP4	0	3
AGPAT2	0	3
CYP27A1	0	3
LOC100133855	0	3
NPEPL1	0	3
SSH1	0	3
TBC1D10C	0	3
PALMD	0	3
RGS11	0	3
LOC442442	0	3
C14orf32	0	3
SNORA74B	0	3
HNRPH3	0	3
TMEM173	0	3
CD74	0	3
HSPA12B	0	3
UBXN11	0	3
C9orf31	0	3
C10orf116	0	3
CD52	0	3
GPSM3	0	3
EMP3	0	3
ROBO4	0	3
LOC730323	0	3
HDAC8	0	3
CBX7	0	3
PRR23A	0	3
EFEMP2	0	3
GSC2	0	3
LOC100130886	0	3
ICAM1	0	3
C1orf24	0	3
EFCBP1	0	3
LOC647348	0	3
ARMCX1	0	3
TNFRSF1B	0	3
ASMTL	0	3
CLEC1A	0	3
LGALS9	0	3
HCFC2	0	3
IQSEC1	0	3
ZDHHC23	0	3
ANKRD44	0	3
GZMB	0	3
TTC10	0	3
LOC643662	0	3
DEFB109P1	0	3
WASH2P	0	3
SPATA18	0	3
JAM2	0	3
CAPS2	0	3
PATL2	0	3
TTC21A	0	3
LOC642904	0	3
ZNF483	0	3
LOC651648	0	3
NCOA1	0	3
LOC642384	0	3
TRPC6	0	3
SLC43A2	0	3
SFTPB	0	3
CD81	0	3
C12orf74	0	3
FBP1	0	3
TCIRG1	0	3
BTN3A3	0	3
LOC653696	0	3
SYT11	0	3
FLJ32310	0	3
LOC653829	0	3
PKHD1L1	0	3
C1QB	0	3
LOC653066	0	3
FLJ10986	0	3
ANPEP	0	3
TNFRSF14	0	3
LOC283537	0	3
NME5	0	3
MZF1	0	3
CETP	0	3
SLC15A3	0	3
LOC653157	0	3
PAN3	0	3
TTLL3	0	3
GLRX	0	3
LOC731542	0	3
TCTE3	0	3
GTF2IRD2P	0	3
CYB5R3	0	3
MIR646	0	3
EFCAB6	0	3
C16orf93	0	3
EIF4E3	0	3
MYOZ3	0	3
LOC387647	0	3
LOC650436	0	3
KIAA1920	0	3
LILRB5	0	3
RILP	0	3
TMEM17	0	3
CBARA1	0	3
LOC643367	0	3
C14orf173	0	3
ABCA9	0	3
AQP1	0	3
TMEM108	0	3
LGI3	0	3
CLYBL	0	3
IL7R	0	3
MSRA	0	3
GJC2	0	3
MS4A7	0	3
YLPM1	0	3
LOC653509	0	3
CAPSL	0	3
MIRLET7D	0	3
CRIP1	0	3
SLC7A7	0	3
ZSWIM7	0	3
C9orf14	0	3
GBP3	0	3
FAM62B	0	3
C9orf24	0	3
IL4R	0	3
SFTPA2	0	3
PTAFR	0	3
CCDC69	0	3
ACTG2	0	3
MAN2B2	0	3
DPEP2	0	3
C9orf82	0	3
TM4SF1	0	3
SFTPA1B	0	3
LOC649446	0	3
P8	0	3
SPAG8	0	3
ZNF438	0	3
DZIP1L	0	3
LOC650843	0	3
LOC100131546	0	3
KIAA1727	0	3
MYL9	0	3
HHIP	0	3
LOC642428	0	3
HLA-DRB1	0	3
CTNNAL1	0	3
C9orf68	0	3
MEG3	0	3
LOC132241	0	3
ZFP95	0	3
ATP6V0A1	0	3
LOC644808	0	3
IMMP2L	0	3
SNORD10	0	3
BRD2	0	3
IL32	0	3
MYO1F	0	3
RPS6KA1	0	3
GRRP1	0	3
CD300LF	0	3
ARRDC5	0	3
DENND4C	0	3
TCF7L2	0	3
SSPN	0	3
APH1B	0	3
LOC391767	0	3
QRFPR	0	3
LYZ	0	3
CDV3	0	3
TCEAL3	0	3
LOC646788	0	3
CORO7	0	3
NDUFA3	0	3
NRBP2	0	3
OLFML3	0	3
RADIL	0	3
LOC100134728	0	3
GATA2	0	3
ZMIZ1	0	3
TMEM133	0	3
DOK2	0	3
CFLAR	0	3
ENPP6	0	3
FCN3	0	3
CXCL6	0	3
ADCY4	0	3
PLD3	0	3
CIRBP	0	3
LOC100129539	0	3
SMA4	0	3
PTGR2	0	3
MLKL	0	3
PDLIM3	0	3
FCGR1A	0	3
LOC100134609	0	3
CRTAC1	0	3
FLJ36131	0	3
UNC93B1	0	3
LOC653425	0	3
AZI2	0	3
TBC1D2	0	3
PGM5	0	3
MUSTN1	0	3
FIS	0	3
ANKRD33	0	3
LOC222967	0	3
VSIG2	0	3
KIAA1128	0	3
RNF130	0	3
MICAL1	0	3
TAPT1	0	3
IRF8	0	3
CAV2	0	3
BCL3	0	3
LOC100133950	0	3
TMEM167B	0	3
PDE8B	0	3
MARCO	0	3
LOC439951	0	3
C17orf44	0	3
PSCDBP	0	3
TNXA	0	3
SPG3A	0	3
FCER1G	0	3
LOC146177	0	3
MT1A	0	3
C3orf15	0	3
CTSO	0	3
CACNA2D4	0	3
DDR2	0	3
NFKBIA	0	3
KCTD12	0	3
CTSH	0	3
FLJ43390	0	3
TSPAN4	0	3
LOC652750	0	3
IFT57	0	3
KIAA1602	0	3
C10orf6	0	3
LOC644224	0	3
C21orf24	0	3
LOC388820	0	3
MFNG	0	3
ALDH3B1	0	3
SCNN1G	0	3
MLH1	0	3
ABHD14A	0	3
LOC730415	0	3
IFNAR2	0	3
HLA-C	0	3
NBPF14	0	3
ZNFX1	0	3
TDRD1	0	3
CCDC92	0	3
CX3CR1	0	3
NCOA7	0	3
ODF3B	0	3
JDP2	0	3
LOC345930	0	3
CXorf45	0	3
WFDC1	0	3
LOC646173	0	3
MGC33657	0	3
LOC123688	0	3
RBM25	0	3
HAS1	0	3
ST7	0	3
INO80	0	3
SERPINA3	0	3
HLA-DRB3	0	3
MFSD9	0	3
RNASE8	0	3
PTH1R	0	3
WFDC6	0	3
LOC653463	0	3
MT2A	0	3
ADAMTSL3	0	3
CALHM2	0	3
PHYHD1	0	3
LEPREL1	0	3
PPARGC1B	0	3
MGC71993	0	3
FAM13B	0	3
PLAUR	0	3
LOC728045	0	3
ITPRIP	0	3
ZMYM6	0	3
LOC153561	0	3
TADA2B	0	3
PZP	0	3
SCGB3A2	0	3
APOL3	0	3
NDFIP1	0	3
SRRM2	0	3
C2orf40	0	3
LOC100129986	0	3
PPP4R4	0	3
IL1R1	0	3
LOC100128781	0	3
FCHO2	0	3
FBXL13	0	3
ANO6	0	3
HSD17B6	0	3
PHF11	0	3
LOC389105	0	3
EVL	0	3
CES1	0	3
FLJ11000	0	3
SOX18	0	3
SUSD1	0	3
ICAM5	0	3
CFD	0	3
MYBPHL	0	3
KLRD1	0	3
TMEM37	0	3
ZAK	0	3
C1orf162	0	3
ITGAL	0	3
C11orf54	0	3
TRIM8	0	3
FLVCR2	0	3
CH25H	0	3
MGC42105	0	3
CYP4B1	0	3
C10orf32	0	3
ROS1	0	3
C1QTNF1	0	3
LOC647384	0	3
LOC650919	0	3
LOC100132388	0	3
LTA4H	0	3
FLJ23834	0	3
AXUD1	0	3
LOC401805	0	3
ZNF471	0	3
C14orf153	0	3
ZNF788	0	3
LOC100130229	0	3
SNORD114-2	0	3
CCDC88A	0	3
TMTC2	0	3
EDG1	0	3
FLJ22795	0	3
C10orf73	0	3
WDR63	0	3
FLJ46230	0	3
LOC100134787	0	3
XRCC2	0	3
LOC400950	0	3
Note 1: 1 stands for mRNAs that are anti-correlated to the expression of its refulation miRNAs; 2 stands for mRNAs that are correlated to the expression of its resulation miRNAs;3 stahds for mRNAs whose miRNA regulation values are null.
